# Supplementary material for: The ALS/FTLD associated protein C9orf72 associates with SMCR8 and WDR41 to regulate the autophagy-lysosome pathway
Source: PubMed Central journal article supplement (PMC4870812; doi:10.1186/s40478-016-0324-5), 2016-05-18
Supplement: 40478_2016_324_MOESM2_ESM.pdf [file 40478_2016_324_MOESM2_ESM.pdf]

| Protein       | Log2 fold change (GFP/GFP-C9 IP) | P Value  | count | count_H | count_L |
|---------------|----------------------------------|----------|-------|---------|---------|
| WDR41         | -5.43072                         | 1.85E-07 | 23    | 22      | 1       |
| 3110043O21RIK | -4.55343                         | 1.58E-07 | 144   | 114     | 30      |
| SMCR8         | -4.16577                         | 1.75E-06 | 64    | 57      | 7       |
| VDAC3         | -3.5849                          | 3.89E-07 | 29    | 25      | 4       |
| SLC25A4       | -2.51662                         | 3.87E-06 | 20    | 15      | 5       |
| SLC25A5       | -2.48505                         | 5.23E-06 | 50    | 33      | 17      |
| CHCHD3        | -2.15049                         | 8.81E-05 | 14    | 11      | 3       |
| SLC25A12      | -2.11025                         | 1.64E-06 | 29    | 22      | 7       |
| IMMT          | -2.08775                         | 4.91E-05 | 27    | 23      | 4       |
| SLC3A2        | -1.6362                          | 6.02E-06 | 16    | 11      | 5       |
| SLC25A1       | -1.59634                         | 3.73E-06 | 17    | 13      | 4       |
| LOC100046151  | -1.54033                         | 7.94E-06 | 14    | 7       | 7       |
| FAR1          | -1.51678                         | 9.92E-05 | 14    | 11      | 3       |
| SLC25A11      | -1.51539                         | 4.62E-06 | 11    | 8       | 3       |
| DNAJA1        | -1.4873                          | 1.15E-05 | 38    | 29      | 9       |
| GCN1L1        | -1.41411                         | 0.000418 | 18    | 16      | 2       |
| DNAJB11       | -1.38731                         | 1.82E-05 | 14    | 9       | 5       |
| DNAJA2        | -1.38438                         | 2.42E-05 | 27    | 21      | 6       |
| KARS          | -1.31829                         | 0.003613 | 13    | 10      | 3       |
| ASS1          | -1.2955                          | 0.0006   | 13    | 10      | 3       |
| TUBA4A        | -1.25374                         | 4.6E-05  | 11    | 6       | 5       |
| SLC25A4       | -1.24254                         | 3.49E-05 | 59    | 34      | 25      |
| MTAP1B        | -1.18204                         | 9.49E-05 | 79    | 57      | 22      |
| SLC25A4       | -1.10584                         | 0.000127 | 24    | 13      | 11      |
| NSF           | -1.0949                          | 0.00141  | 11    | 7       | 4       |
| 2310079N02RIK | -1.01951                         | 0.000344 | 15    | 10      | 5       |
| TUBA1A        | -1.00626                         | 0.000273 | 30    | 17      | 13      |

**Table S1: List of hits from the SILAC proteomic screen.**

Proteins with more than 10 peptides and Log2 fold changes (GFP/GFP-C9orf72) <-1.00 are listed  
count=total number of peptides identified;  
count\_H: number of peptides in the heavy fraction;  
count\_L: number of peptides in the light fraction.
