# Supplementary material for: The ALS/FTLD associated protein C9orf72 associates with SMCR8 and WDR41 to regulate the autophagy-lysosome pathway
Source: PubMed Central journal article supplement (PMC4870812; doi:10.1186/s40478-016-0324-5), 2016-05-18
Supplement: 40478_2016_324_MOESM3_ESM.pdf [file 40478_2016_324_MOESM3_ESM.pdf]

**a**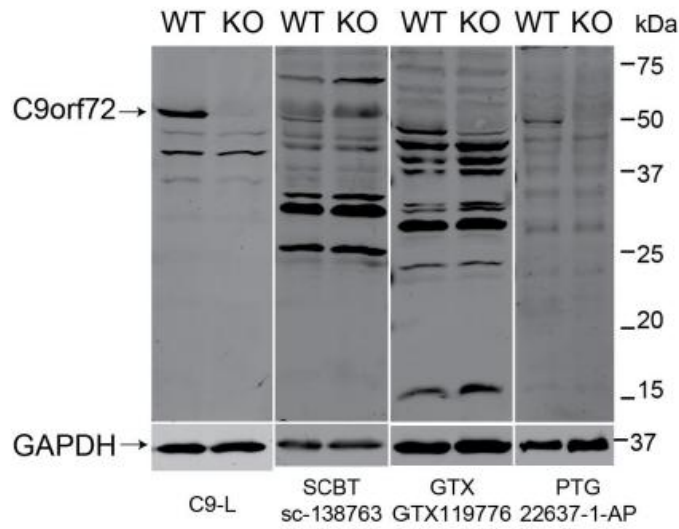**b**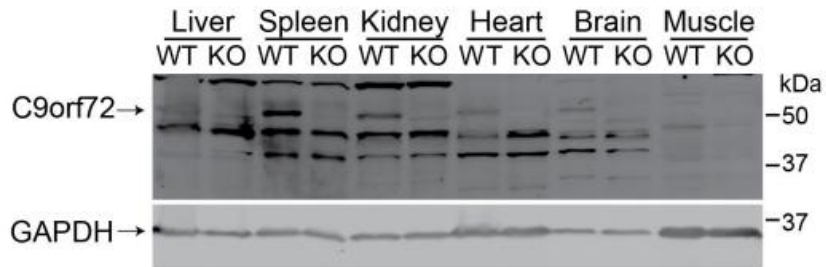

**Figure S2: Absence of C9orf72 isoform I in the C9orf72 CRISPR targeted mice. a.** Western blot of brain lysates from WT or C9orf72 deficient (KO) mice using various C9orf72 antibodies as indicated. **b.** Western blot analysis of C9orf72 protein levels in wild type (WT) and C9orf72 knockout (KO) mouse tissues with anti-C9-L antibodies.
