# Supplementary material for: The ALS/FTLD associated protein C9orf72 associates with SMCR8 and WDR41 to regulate the autophagy-lysosome pathway
Source: PubMed Central journal article supplement (PMC4870812; doi:10.1186/s40478-016-0324-5), 2016-05-18
Supplement: 40478_2016_324_MOESM4_ESM.pdf [file 40478_2016_324_MOESM4_ESM.pdf]

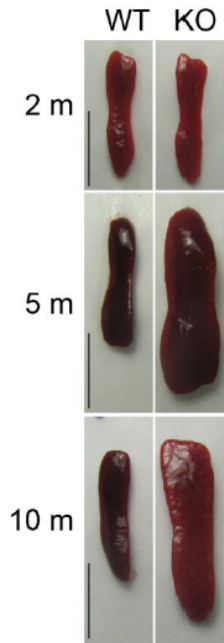

**Figure S3: *C9orf72* deficiency in mice leads to age dependent spleen enlargement.** Representative images of spleen dissected from 2 month, 5 month and 10 month old WT and *C9orf72*<sup>-/-</sup> mice are shown. Scale bar=1cm.
